# Supplementary material for: Sleep deprivation suppresses aggression in Drosophila
Source: eLife. 2015 Jul 28;4:e07643. doi: 10.7554/eLife.07643 (PMC4515473; doi:10.7554/eLife.07643)
Supplement: Figure 1—source data 1. — DOI: http://dx.doi.org/10.7554/eLife.07643.004 [file elife07643s001.xlsx]

## Sheet: Fig 1A
Lunge counts
ctrl	dep	ctrl v ctrl	dep v dep	ctrl - day	dep - day	ctrl - recov	dep - recov
15	29	30	12	51	3	6	4
37	0	62	4	64	11	98	156
12	0	109	0	14	4	15	32
61	0	90	1	66	34	49	51
41	0	42	0	36	35	28	58
58	0	18	0	6	3	16	79
9	11	34	1	66	10	40	35
11	0	84	1	58	4	29	139
33	0	38	9	136		27	69
29	0		4	31		60	5
15	8					129
59	0					52
11	8					58
52	0					108
0	12
61	0

## Sheet: Fig 1C
Lunge latency (s)
ctrl	deprived
152	1120
1025	414
207	2742
53	2464
45	189
1371	250
375	1414
69
134

## Sheet: Fig 1D
Lunge counts
1hr ctrl	1hr dep	3 hr ctrl	3hr dep	6 hr ctrl	6 hr dep
181	62	131	86	125	40
159	138	88	102	101	31
122	299	101	84	87	65
130	66	80	64	56	41
32	107	164	49	168	18
94	129	89	203	300	8
105	160	89	160	242	44
124	97	77	170	137	43
		234	117	45	54
		141		23	29
		188		237	57
		159			100
		188

## Sheet: Fig 1E
Lunge counts
Control	Mechanical Stimulation
115	232
49	9
47	42
44	76
83	38
316	127
172	80
160	187
54	197
305	73
77	162

## Sheet: Fig 1F
Lunge counts
1 - ctrl	1 - dep	3 - ctrl	3 - dep	6 - ctrl	6 - dep	9 - ctrl	9 - dep
197	30	15	87	20	129	96	65
132	22	0	64	131	178	164	197
102	48	242	40	118	113	68	134
133	1	227	70	27	58	136	107
151	24	161	7	8	51	62	229
155	47	183	23	0	73	60	89
9	2	225	32	147	174	84	203
98	21	87	2	160	300	49	124
217	47	223	1	196	85	270	51
101	49	115	104	139	5	188	76
		167	36	196	90	101	31
		63	17	259	28	155	7
		48	136	87	62	146
		60	126	97	38	3
		163	57	229	0	46
		93	4	103	135
		273	0	167	80
		50		82	77
				80
