# Supplementary material for: Sleep deprivation suppresses aggression in Drosophila
Source: eLife. 2015 Jul 28;4:e07643. doi: 10.7554/eLife.07643 (PMC4515473; doi:10.7554/eLife.07643)
Supplement: Figure 2—source data 1. — DOI: http://dx.doi.org/10.7554/eLife.07643.012 [file elife07643s002.xlsx]

## Sheet: Fig 2A
Lunge counts
Tdc2-GAL4>TrpA1			TH-GAL4>TrpA1
Ctrl	Dep		Ctrl	Dep
88	18		68	20
3	9		85	0
233	59		218	0
107	74		182	0
113	0		57	0
188	77		101	3
37	37		142	26
83	75		198	0
109	2		70	0
117	12		85	125
	9			0
	11			0
	10
	23
	0
	0

## Sheet: Fig 2B
Lunge counts
Tdc2-GAL4>TrpA1
no drug	l-dopa	CDM
12	5	183
5	0	183
54	0	95
18	34	41
34	59	207
0	10	72
9	34	102
11	59	18
10	10
23	24
0
0

## Sheet: Fig 2C
Lunge counts
TH-GAL4>TrpA1
no drug	l-dopa	CDM
0	0	101
0	0	0
3	0	138
20	8	13
0	0	17
0	11	21
26	6	55
0	0	122
0	63	0
	0	28
0	27	101
0	65	30

## Sheet: Fig 2D
Lunge counts
Control	Grouped	+L-DOPA	+CDM
74	40	127	87
84	29	67	98
27	30	17	52
67	27	47	138
150	17	44	89
106	60	57	105
74	40	107	132
84	29	161	76
27	30	81	197
		241	112
		155	104
		209	101

## Sheet: Fig 2E
Activity counts
TH/+ 29	TH/trpa 29	TH/trpa 29+LDOPA	TH/trpa 29+CDM
155	5	137	206
147	67	105	81
89	32	100	169
92	91	74	185
158	95	136	171
91	86	135	84
56	69	98	202
265	122	92	95
109	10	106	135
140	65	200	144
102	71	179	157
125	92	174	130
144	54	100	109
120	92	235	44
77	87	142	110
111	32	64	61
		120	101
		138	55
		151	147
		96	89
		83	61
		131	99
		152	104
		106	0
		82	54
		132	111
		171	66
		141	70
		41	39
		83	128
		199	97
		142	106
