# Supplementary material for: Sleep deprivation suppresses aggression in Drosophila
Source: eLife. 2015 Jul 28;4:e07643. doi: 10.7554/eLife.07643 (PMC4515473; doi:10.7554/eLife.07643)
Supplement: Figure 3—source data 1. — DOI: http://dx.doi.org/10.7554/eLife.07643.018 [file elife07643s003.xlsx]

## Sheet: Fig 3C
	Lunge counts
	Tdc2-GAL4>TrpA1		Tdc2-GAL4; Cha-GAL80>TrpA1
Overnight temp	21	29	21	29
	88	0	90	0
	27	7	99	77
	60	2	1	0
	43	13	3	153
	184	53	35	167
	5	4	64	164
	31	2	44	78
	4	18	162	188
	61	3	0	183
	39	11	288	0
	87	0	79	94
	125	7	280	153
	81	0	132	3
	75	9	158	50
		8	234	53
			104
