# Supplementary material for: Sleep deprivation suppresses aggression in Drosophila
Source: eLife. 2015 Jul 28;4:e07643. doi: 10.7554/eLife.07643 (PMC4515473; doi:10.7554/eLife.07643)
Supplement: Figure 4—source data 1. — DOI: http://dx.doi.org/10.7554/eLife.07643.020 [file elife07643s004.xlsx]

## Sheet: Fig 4A
Courtship index to Female
ctrl	deprived
0.296667	0.431694
0.32	0.32807
0.2	0.289703
0.25	0.375281
0.342424	0.277273
0.442857	0.451104
0.28421	0.466667
0.305165	0.374256
0.519608	0.528333
0.427948	0.295
0.306123	0.237322
0.466667	0.451667
0.445833	0.298333
0.626728	0.408333
0.32	0.266667
0.506667	0.39
0.47	0.5
0.459016	0.318518
0.431034	0.27027
0.4	0.309434
0.475362	0.343512
0.457013	0.63
0.313869	0.330435
0.565079	0.444444
0.54329	0.336364
0.590741	0.469768
0.312925	0.356807
0.533333	0.655
0.485294	0.620833
0.310638	0.829167
0.615385	0.392157
0.503722

## Sheet: Fig 4B
Courtship index to Male
ctrl	deprived
0.00666667	0.0546448
0.005	0.0175439
0.0311111	0.0593368
0.0904255	0.0382023
0.0454546	0.0954545
0.0333333	0.0757098
0.0245614	0.0222222
0.0337932	0.0518735
0.0588235	0.0433333
0.0567686	0.0233333
0.0884354	0.0567951
0.0266667	0.055
0.025	0.0333333
0.0322581	0.025
0.0116667	0.0583333
0.07	0.045
0.08	0.0577778
0.0327869	0.0407407
0.0431035	0.042042
0.05	0.045283
0.0550725	0.0572519
0.0551605	0.06
0.0255474	0.0369565
0.0507937	0.0759259
0.021645	0.0272727
0.0314815	0
0.0238095	0.0375587
0.031746	0.0166667
0.0441177	0.0333333
0.0382979	0.0125
0.0282051	0.027451
0.00992556

## Sheet: Fig 4C
% Time in chains/clusters
ctrl	deprived
23	14.7541
34.5	20.7018
30.4444	22.6876
49.4681	28.9888
21.2121	0.909091
32.3809	7.88643
31.9298	27.7778
19.1667	39
12.4454	14.5
23.4694	17.0385
40.5	20.6667
26.25	8.33333
12.4424	25
24.6667	6.66667
21.3115	19.8333
23.8506	22.8889
22	9.25926
18.8406	0
17.1756	20.1887
25.9124	4.96183
6.98413	10
30.303	16.3043
35.5556	9.25926
6.46258	12.7273
36.8254	29.3023
15.0735	24.4132
24.2553	0
47.6923	28.3333
39.9504	26.25
	28.6274

## Sheet: Fig 4D
% copulation winner
5 independent experimental replicates, 116 total assays
ctrl	sleep deprived
59.2593	40.7407
65	35
65.2174	34.7826
68.1818	31.8182
58.3333	41.6667

## Sheet: Fig 4E
% copulation winner
summed from 3 independent experimental replicates
ctrl	sleep deprived+ no drug
80	20
ctrl	sleep deprived+ L-DOPA
79	21
ctrl	sleep deprived+ CDM
48	52
